# Supplementary material for: Reconstruction of Cell Lineage Trees in Mice
Source: PLoS One. 2008 Apr 9;3(4):e1939. doi: 10.1371/journal.pone.0001939 (PMC2276688; doi:10.1371/journal.pone.0001939)
Supplement: Table S3 — Cell identifiers for ML2 (0.10 MB XLS) [file pone.0001939.s005.xls]

## Sheet: Sheet1
ML2
Locus index	1		2		3		4		5		6		7		8		9		10		11		12		13		14		15		16		17		18		19		20		21		22		23		24		25
Locus name	ABI73		ABI81		ABI65		6929		ABI2		ABI10		ABI89		3853		Barvaz		2924		382		D2Mit66		D2Mit411		D1Mit1001		D2Mit100		D1Mit426		2621		3464		2454		1663		2462		6231		1053		2492		ABI8
Fluorescence	FAM		NED		VIC		PET		FAM		NED		VIC		PET		FAM		NED		VIC		PET		FAM		NED		VIC		PET		FAM		NED		VIC		PET		FAM		NED		VIC		PET		FAM
Putative zygote	203.34	209.45	213.55	215.45	177.12	193.4	134.7	194	92.17	94.17	90	93.93	222.1	224.15	331	386	275.9	275.9	351.95	357.5	244.85	282.4	252.9	252.9	97	101	130.5	130.5	105.45	109.2	84	93	178	180	156.35	183	195.1	230.9	N/A	N/A	240.7	287.85	463.1	485.2	490.1	490.1	372.5	377.5	121.7
ML2_S37	0	0	0	0	0	0	X	X	0	0	0	0	0	0	X	X	0	X	0	X	0	X	X	X	0	-1	0	X	0	0	0	0	X	X	X	X	0	X	X	X	0	0	X	0	0	X	0	0	NCNN
ML2_S38	0	0	0	1	0	X	X	X	0	0	-1	0	0	X	X	X	X	X	X	X	X	X	X	X	0	0	NCNN	X	0	0	1	X	X	X	X	X	X	X	X	X	X	X	NCNN	NCNN	0	X	0	X	NCNN
ML2_S39	0	0	0	0	0	X	X	X	X	0	-1	1	0	0	X	X	0	1	X	X	0	X	X	X	0	X	0	X	0	0	0	X	X	X	NCNN	X	0	0	X	X	0	0	X	0	0	X	X	X	NCNN
ML2_S40	0	0	-1	0	0	X	X	X	0	0	0	1	0	X	X	X	1	X	X	X	0	X	X	X	0	0	NCNN	0	0	0	0	0	X	X	X	X	X	X	X	X	0	0	X	0	0	X	0	0	X
ML2_S41	0	-1	-1	0	0	X	X	X	-1	0	-1	0	0	X	X	X	-1	0	NCNN	X	3	0	X	X	0	X	0	X	0	0	0	0	X	X	NCNN	X	0	X	X	X	0	0	X	X	0	X	0	0	NCNN
ML2_S42	0	1	0	0	0	X	X	X	0	0	0	0	0	0	X	X	0	X	X	X	X	X	X	X	0	0	0	X	-1	-1	0	0	X	X	NCNN	X	0	X	X	X	X	0	X	0	0	X	0	0	X
ML2_S43	1	0	0	0	0	X	X	X	0	0	0	0	-1	0	X	X	-1	0	NCNN	X	1	0	X	X	0	X	0	X	0	0	0	X	X	X	NCNN	X	0	0	X	X	0	0	X	X	0	X	0	0	X
ML2_S44	0	1	0	0	0	X	X	X	0	0	1	0	0	0	X	X	-1	0	X	X	2	X	X	X	0	0	NCNN	X	0	0	0	0	X	X	X	NCNN	0	X	X	X	0	0	0	X	0	X	0	0	X
ML2_S45	0	-1	0	0	0	0	X	X	0	0	0	0	-1	0	X	X	0	1	NCNN	X	0	X	X	X	0	0	0	X	0	0	0	X	X	X	NCNN	X	0	X	X	X	0	0	X	X	0	X	0	0	X
ML2_S46	0	1	0	0	X	0	X	X	0	0	1	1	0	X	X	X	X	X	X	X	X	X	X	X	0	X	0	X	0	0	0	0	X	X	NCNN	X	0	0	X	X	X	X	X	0	0	X	X	0	X
ML2_S47	X	0	X	X	X	0	X	X	0	X	X	X	X	0	X	X	X	X	X	0	X	X	X	X	0	X	0	X	X	0	X	0	X	X	X	X	0	X	X	X	X	0	X	X	-1	X	X	0	X
ML2_S48	-1	-1	-1	-1	0	0	X	X	0	X	X	X	0	0	X	X	-2	0	0	X	0	X	X	X	X	0	0	X	0	0	0	0	X	X	X	X	0	X	X	X	X	X	X	X	X	X	X	X	X
ML2_S49	X	X	0	X	X	0	X	X	0	X	X	0	X	X	X	X	0	X	X	X	1	X	X	X	-1	X	0	X	X	X	X	0	X	X	X	0	0	X	X	X	0	X	X	X	X	X	X	X	X
ML2_S50	X	X	X	0	X	X	X	X	X	X	0	X	X	0	X	X	X	X	X	X	X	X	X	X	X	X	X	X	X	0	X	0	X	X	0	NCNN	0	X	X	X	X	X	X	X	0	X	X	0	0
ML2_S51	X	X	X	X	X	X	X	X	X	X	X	0	X	X	X	X	X	X	X	X	X	X	X	X	X	X	X	X	X	X	X	X	X	X	0	X	X	0	X	X	X	0	X	X	X	X	X	X	NCNN
ML2_S52	X	0	1	1	X	X	X	X	X	X	0	NCNN	X	X	X	X	X	X	X	X	X	X	X	X	0	X	0	X	X	X	X	X	X	X	X	X	NCNN	X	X	X	X	X	X	X	0	X	0	X	NCNN
ML2_S53	0	X	0	X	0	X	X	X	0	X	0	X	0	X	X	X	X	X	0	X	X	0	X	X	X	0	0	X	X	X	X	0	X	X	0	X	0	X	X	X	0	X	0	0	0	X	X	0	0
ML2_S54	0	X	X	X	0	X	X	X	X	X	X	0	0	X	X	X	X	X	0	X	X	X	X	X	X	2	0	X	0	X	0	X	X	X	X	NCNN	X	0	X	X	0	X	X	0	0	X	X	X	NCNN
ML2_S55	X	X	X	X	X	0	X	X	X	X	X	X	X	X	X	X	NCNN	NCNN	0	0	X	NCNN	0	X	NCNN	NCNN	0	0	X	X	NCNN	NCNN	PS	PS	X	0	0	X	PS	PS	X	X	X	X	X	X	X	X	X
ML2_S56	X	X	X	X	X	X	X	X	0	X	0	0	X	X	X	X	NCNN	NCNN	0	0	X	NCNN	X	X	NCNN	NCNN	X	X	X	X	NCNN	NCNN	PS	PS	X	X	X	X	PS	PS	X	X	X	X	X	X	X	X	X
ML2_S57	X	X	X	X	-1	X	X	X	X	X	0	0	X	X	X	X	NCNN	NCNN	0	0	X	NCNN	X	X	NCNN	NCNN	X	X	X	X	NCNN	NCNN	PS	PS	X	X	X	X	PS	PS	0	X	X	X	0	0	X	X	X
ML2_S58	X	X	X	X	X	X	X	X	X	X	X	X	X	X	X	X	NCNN	NCNN	0	0	X	NCNN	X	X	NCNN	NCNN	X	X	X	X	NCNN	NCNN	PS	PS	X	X	X	X	PS	PS	X	X	X	X	X	X	X	X	X
ML2_S59	X	X	-1	0	0	0	X	X	0	0	X	X	X	X	X	X	NCNN	NCNN	0	0	X	NCNN	X	X	NCNN	NCNN	0	0	X	X	NCNN	NCNN	PS	PS	0	-1	X	0	PS	PS	X	X	0	-1	X	X	X	X	X
ML2_S60	X	X	0	0	0	X	X	X	0	X	1	X	X	X	X	X	NCNN	NCNN	0	0	X	NCNN	X	X	NCNN	NCNN	X	-1	0	X	NCNN	NCNN	PS	PS	X	X	0	0	PS	PS	X	0	X	0	0	0	X	X	0
ML2_S61	X	X	0	1	X	0	X	X	X	X	-1	-2	X	X	X	X	NCNN	NCNN	0	0	X	NCNN	X	X	NCNN	NCNN	X	1	X	X	NCNN	NCNN	PS	PS	-1	X	X	0	PS	PS	X	X	X	X	X	X	X	X	X
ML2_S62	0	0	X	X	X	X	X	X	X	X	X	X	X	X	X	X	NCNN	NCNN	0	0	X	NCNN	X	X	NCNN	NCNN	X	-1	X	X	NCNN	NCNN	PS	PS	X	X	0	X	PS	PS	X	X	X	X	X	X	X	X	X
ML2_S63	0	0	-1	-1	0	0	X	X	0	0	X	X	X	X	X	X	NCNN	NCNN	0	0	-3	NCNN	X	X	NCNN	NCNN	X	X	0	0	NCNN	NCNN	PS	PS	X	X	X	X	PS	PS	0	X	X	0	0	0	X	X	X
ML2_S64	0	0	-1	-1	0	0	X	X	X	X	X	X	X	X	X	X	NCNN	NCNN	0	0	0	NCNN	X	X	NCNN	NCNN	X	X	X	X	NCNN	NCNN	PS	PS	0	1	0	X	PS	PS	X	0	X	X	X	X	X	X	X
LEGEND
Analyzed values:
-5
-4
-3
-2
-1
0
1
2
3
4
5
Non-analyzed values:
X = No signal
NSD = No sizing data
PS = Problematic signal
NAMP = Not amplified
NCNN = NC not negative
[truncated: 131 more columns]
