# Supplementary material for: Reconstruction of Cell Lineage Trees in Mice
Source: PLoS One. 2008 Apr 9;3(4):e1939. doi: 10.1371/journal.pone.0001939 (PMC2276688; doi:10.1371/journal.pone.0001939)
Supplement: Table S4 — Cell identifiers for ML4 (0.10 MB XLS) [file pone.0001939.s006.xls]

## Sheet: Sheet1
ML4
Locus index	1		2		3		4		5		6		7		8		9		10		11		12		13		14		15		16		17		18		19		20		21		22		23		24		25
Locus name	ABI73		ABI81		ABI65		6929		ABI2		ABI10		ABI89		3853		Barvaz		2924		382		D2Mit66		D2Mit411		D1Mit1001		D2Mit100		D1Mit426		2621		3464		2454		1663		2462		6231		1053		2492		ABI8
Fluorescence	FAM		NED		VIC		PET		FAM		NED		VIC		PET		FAM		NED		VIC		PET		FAM		NED		VIC		PET		FAM		NED		VIC		PET		FAM		NED		VIC		PET		FAM
Putative zygote	202.5	208.6	213.6	215.5	177.2	193.1	N/A	N/A	92.07	94.03	90	93.9	221.4	223.5	N/A	N/A	273.3	275.36	351.98	N/A	246	283.4	252.9	N/A	96.8	100.95	130.55	130.55	105.35	109.15	84.4	92.8	177	186.7	156.5	177.22	195	230.7	142.1	150.5	240.97	288.3	463.8	486.2	485.93	N/A	372.09	N/A	121.59
ML4_S1	0	X	0	0	0	0	X	X	0	X	1	0	X	X	X	X	X	X	X	X	0	X	0	X	0	-1	0	X	-1	X	0	-1	X	X	X	X	X	X	X	X	X	0	-1	X	X	X	X	X	X
ML4_S2	X	X	X	X	0	0	X	X	0	0	0	X	0	X	X	X	X	X	X	X	0	X	NCNN	X	X	-2	0	X	0	0	0	0	X	X	0	X	0	0	X	X	0	X	0	X	0	X	X	X	X
ML4_S3	1	X	0	0	0	0	X	X	0	X	0	0	-1	0	X	X	X	X	X	X	0	X	NCNN	X	0	X	0	X	0	0	0	0	X	X	X	X	0	X	X	X	0	X	0	X	X	X	X	X	0
ML4_S4	1	X	0	X	0	X	X	X	0	X	0	0	0	X	X	X	X	X	X	X	0	X	X	X	0	X	0	X	0	0	0	0	X	X	X	X	0	X	X	X	0	X	0	X	0	X	X	X	0
ML4_S5	1	0	0	0	X	0	X	X	0	0	0	0	0	X	X	X	X	X	X	X	0	X	NCNN	X	0	0	0	X	0	0	0	0	X	X	NCNN	X	0	X	X	X	0	X	0	0	0	X	X	X	X
ML4_S6	0	X	0	0	0	0	X	X	X	X	0	X	-1	-1	X	X	X	0	0	X	0	X	X	X	0	-1	0	X	X	0	0	0	X	X	NCNN	X	0	X	X	X	0	0	0	0	0	X	0	X	X
ML4_S7	0	1	0	0	X	0	X	X	0	0	0	0	0	0	X	X	X	0	0	X	0	X	X	X	0	0	0	X	0	-1	0	0	X	X	X	X	0	X	X	X	0	0	0	0	0	X	0	X	X
ML4_S8	0	0	0	0	0	X	X	X	0	0	0	0	0	X	X	X	X	0	0	X	0	X	X	X	0	-1	0	X	0	0	0	0	X	X	X	X	0	X	X	X	0	0	X	0	0	X	0	X	0
ML4_S9	X	X	0	X	0	X	X	X	X	0	0	X	X	0	X	X	X	0	0	X	0	0	X	X	0	X	0	X	0	X	0	X	X	X	X	X	X	X	X	X	0	X	0	X	X	X	0	X	X
ML4_S10	0	1	0	X	X	0	X	X	X	0	0	0	0	X	X	X	0	X	0	X	X	X	X	X	0	0	0	X	0	0	0	0	X	X	-1	X	0	X	X	X	0	0	X	X	0	X	0	X	X
ML4_S11	X	0	X	0	0	X	X	X	X	0	0	0	0	0	X	X	X	0	0	X	0	0	X	X	X	X	X	X	X	X	X	X	X	X	0	NCNN	0	X	X	X	0	X	0	0	0	X	0	X	X
ML4_S12	1	1	X	X	0	X	X	X	X	0	0	X	X	0	X	X	X	1	0	X	X	0	X	X	NCNN	X	-1	X	0	X	X	X	X	X	X	X	X	0	X	X	0	X	X	0	0	X	0	X	0
ML4_S13	0	X	0	0	0	0	X	X	0	0	0	X	0	X	X	X	1	1	0	X	0	X	X	X	NCNN	NCNN	0	X	0	0	0	X	X	X	0	X	0	0	X	X	0	0	0	0	X	X	0	X	0
ML4_S14	X	X	X	X	X	X	X	X	X	X	X	X	X	X	X	X	X	X	X	X	X	X	X	X	X	X	X	X	X	X	X	X	X	X	X	X	X	X	X	X	X	X	X	X	X	X	X	X	X
ML4_S15	X	X	X	X	X	X	X	X	X	X	X	X	X	X	X	X	X	X	X	X	X	X	X	X	X	X	X	X	X	X	X	X	X	X	X	X	X	X	X	X	X	X	X	X	X	X	X	X	NCNN
ML4_S16	0	0	X	X	X	0	X	X	0	X	0	X	X	0	X	X	X	X	X	X	X	X	X	X	X	0	X	X	X	0	X	0	X	X	-1	NCNN	0	X	X	X	X	0	X	X	0	X	0	X	X
ML4_S17	X	X	X	0	X	X	X	X	X	X	0	X	X	0	X	X	X	X	0	X	X	X	X	X	X	0	0	X	0	0	X	X	X	X	X	X	0	X	X	X	0	X	X	X	0	X	0	X	X
ML4_S18	0	0	0	0	0	0	X	X	X	0	0	0	0	0	X	X	1	1	NCNN	X	X	X	X	X	NCNN	NCNN	0	X	X	-1	0	0	X	X	0	-1	0	X	X	X	0	0	X	0	0	X	0	X	0
ML4_S19	0	X	X	0	0	X	X	X	X	X	X	0	X	X	X	X	0	0	NCNN	X	0	X	X	X	X	NCNN	0	X	X	0	0	X	X	X	X	-1	X	X	X	X	0	0	X	0	1	X	0	X	NCNN
ML4_S20	-1	0	X	0	0	0	X	X	0	0	0	0	0	0	X	X	X	0	0	X	X	X	X	X	NCNN	NCNN	0	X	0	0	0	0	X	X	0	X	0	X	X	X	0	0	X	X	0	X	0	X	X
ML4_S21	X	0	-1	0	0	0	X	X	0	0	0	0	0	0	X	X	0	0	0	X	X	X	X	X	0	X	0	X	0	0	0	0	X	X	X	X	0	X	X	X	0	0	0	X	0	X	0	X	0
ML4_S22	X	X	X	X	0	X	NAMP	NAMP	X	X	X	X	X	X	NAMP	NAMP	X	X	X	X	X	X	0	X	X	X	X	X	X	X	X	X	X	X	X	X	X	X	X	X	PS	PS	X	X	X	X	X	X	PS
ML4_S23	X	X	X	X	0	X	NAMP	NAMP	X	X	X	X	X	X	NAMP	NAMP	X	X	X	X	X	X	X	X	PS	PS	X	X	X	X	X	X	X	X	X	X	X	X	X	X	PS	X	X	X	X	X	X	X	PS
ML4_S24	X	X	PS	PS	0	-1	NAMP	NAMP	X	X	X	0	X	X	NAMP	NAMP	X	X	X	X	X	X	X	X	X	X	0	X	X	X	0	X	X	X	X	X	X	X	X	X	X	X	X	X	X	X	X	X	X
ML4_S25	X	X	X	X	X	0	NAMP	NAMP	X	X	X	X	X	X	NAMP	NAMP	X	X	X	X	X	X	X	X	PS	PS	X	X	X	X	-3	X	X	X	X	X	X	X	X	X	X	X	X	X	X	X	X	X	X
ML4_S26	PS	PS	X	X	PS	PS	NAMP	NAMP	X	X	X	X	X	X	NAMP	NAMP	X	X	X	X	X	X	0	X	X	X	PS	X	PS	PS	0	X	X	X	X	X	X	X	X	X	X	X	X	X	X	X	X	X	X
ML4_S27	X	X	PS	PS	X	0	NAMP	NAMP	X	X	X	X	X	X	NAMP	NAMP	X	X	X	X	X	X	X	X	PS	PS	X	X	X	X	X	X	X	X	X	X	X	X	X	X	X	X	X	X	X	X	X	X	PS
ML4_S28	X	X	X	X	0	X	NAMP	NAMP	X	X	-1	X	X	X	NAMP	NAMP	X	X	X	X	X	X	0	X	0	X	X	X	PS	PS	0	X	0	X	X	X	X	X	X	X	X	X	X	X	X	X	X	X	PS
ML4_S29	X	X	PS	PS	0	X	NAMP	NAMP	X	X	X	X	X	X	NAMP	NAMP	X	X	X	X	X	X	X	X	0	X	X	X	X	X	0	X	0	X	X	X	X	X	X	X	X	X	X	X	X	X	X	X	X
ML4_S30	X	X	X	X	0	0	NAMP	NAMP	X	X	X	0	X	X	NAMP	NAMP	X	X	X	X	X	X	X	X	X	X	X	X	X	X	X	X	X	X	X	X	X	X	X	X	X	X	X	X	X	X	X	X	X
ML4_S31	X	X	X	X	PS	0	NAMP	NAMP	X	X	X	X	X	X	NAMP	NAMP	X	X	X	X	X	X	X	X	X	X	X	X	X	X	X	0	X	X	X	X	X	X	X	X	X	X	X	X	X	X	X	X	PS
LEGEND
Analyzed values:
-5
-4
-3
-2
-1
0
1
2
3
4
5
Non-analyzed values:
X = No signal
NSD = No sizing data
PS = Problematic signal
NAMP = Not amplified
NCNN = NC not negative
[truncated: 131 more columns]
