# Supplementary material for: Reconstruction of Cell Lineage Trees in Mice
Source: PLoS One. 2008 Apr 9;3(4):e1939. doi: 10.1371/journal.pone.0001939 (PMC2276688; doi:10.1371/journal.pone.0001939)
Supplement: Table S6 — Cell identifiers for WGA fidelity experiments (GenomiPhi) (0.06 MB XLS) [file pone.0001939.s008.xls]

## Sheet: Analysis
G-Phi
Locus index	1		2		3		4		5		6		7		8		9		10		11		12		13		14		15		16		17		18		19		20		21		22		23		24		25
Locus name	ABI73		ABI81		ABI65		H610		ABI2		ABI10		ABI89		M1		Barvaz		2924		382		D2Mit66		D2Mit411		D1Mit1001		D2Mit100		D1Mit426		2621		3464		2454		M4		2462		6231		1053		2492		ABI8
Fluorescence	FAM		NED		VIC		PET		FAM		NED		VIC		PET		FAM		NED		VIC		PET		FAM		NED		VIC		PET		FAM		NED		VIC		PET		FAM		NED		VIC		PET		FAM
Putative zygote	209.82	211.89	218.52	231.78	180.2	195.83	150.25	150.25	96.44	96.44	92.55	92.55	225.08	227.14	N/A	N/A	278	289.7	344.66	344.66	246.78	246.78	272.6	272.6	99.75	99.75	132.53	136.81	107.67	107.67	86.58	86.58	185.37	192.94	183.18	197.48	232.43	232.43	251.16	285.59	250.87	N/A	486.81	489.69	504.22	512.76	368.94	378.13	128.88
Clone 1a	0	0	0	0	0	X	0	X	0	X	0	X	0	0	X	X	0	X	0	X	0	X	0	X	0	X	0	0	0	X	0	X	X	X	X	0	0	X	PS	0	0	X	0	X	0	0	0	0	0
Clone 1b	0	X	0	0	0	X	X	X	0	X	X	X	X	0	X	X	0	X	0	X	0	X	X	X	X	X	X	0	0	X	0	X	X	X	X	X	0	X	X	0	0	X	0	X	1	0	X	0	X
Clone 1c	X	0	0	0	0	X	0	X	0	X	X	X	0	0	X	X	0	0	0	X	X	X	0	X	0	X	0	X	X	X	0	X	X	X	X	X	0	X	X	X	0	X	X	0	0	0	0	0	X
Clone 1d	X	X	X	X	X	NCNN	X	X	X	X	X	X	X	X	X	X	X	X	X	X	0	X	X	X	X	X	X	0	X	X	X	X	X	X	X	X	X	X	X	X	X	X	X	X	X	X	X	X	X
Clone 1e	0	X	X	0	0	X	X	X	0	X	X	X	X	X	X	X	X	0	X	X	X	X	0	X	X	X	X	0	X	X	0	X	X	X	X	X	X	X	X	X	0	X	0	X	X	X	X	X	X
Clone 2a	X	0	X	0	X	0	0	X	X	X	0	X	X	0	X	X	X	X	X	X	0	X	0	X	0	X	X	0	0	X	0	X	X	X	0	0	0	X	PS	X	0	X	X	X	0	X	X	X	0
Clone 2b	0	X	X	0	0	X	X	X	0	X	0	X	0	X	X	X	0	0	0	X	0	X	X	X	0	X	0	0	0	X	0	X	X	X	0	0	0	X	PS	0	0	X	0	0	0	X	0	0	0
Clone 2c	0	X	0	0	0	X	0	X	0	X	0	X	X	0	X	X	X	X	0	X	0	X	0	X	0	X	X	0	0	X	0	X	X	X	0	X	0	X	X	X	0	X	0	0	X	0	0	0	0
Clone 2d	0	0	0	0	0	0	0	X	0	X	0	X	0	X	X	X	0	X	0	X	0	X	0	X	0	X	0	0	0	X	0	X	X	X	0	0	0	X	PS	X	0	X	0	0	0	0	X	0	0
Clone 2e	X	X	X	0	0	0	0	X	0	X	0	X	0	0	X	X	0	0	0	X	0	X	0	X	0	X	0	0	0	X	X	X	X	X	X	X	0	X	PS	0	0	X	X	0	0	0	0	X	X
LEGEND
Analyzed values:
-5
-4
-3
-2
-1
0
1
2
3
4
5
Non-analyzed values:
X = No signal
NSD = No sizing data
PS = Problematic signal
NAMP = Not amplified
NCNN = NC not negative
[truncated: 141 more columns]
