# Supplementary material for: Reconstruction of Cell Lineage Trees in Mice
Source: PLoS One. 2008 Apr 9;3(4):e1939. doi: 10.1371/journal.pone.0001939 (PMC2276688; doi:10.1371/journal.pone.0001939)
Supplement: Table S7 — Cell identifiers for WGA fidelity experiments (GenomePlex) (0.09 MB XLS) [file pone.0001939.s009.xls]

## Sheet: Sheet1
G-Plex
Locus index	1		2		3		4		5		6		7		8		9		10		11		12		13		14		15		16		17		18		19		20		21		22		23		24		25
Locus name	ABI73		ABI81		ABI65		H610		ABI2		ABI10		ABI89		M1		Barvaz		2924		382		D2Mit66		D2Mit411		D1Mit1001		D2Mit100		D1Mit426		2621		3464		2454		M4		2462		6231		1053		2492		ABI8
Fluorescence	FAM		NED		VIC		PET		FAM		NED		VIC		PET		FAM		NED		VIC		PET		FAM		NED		VIC		PET		FAM		NED		VIC		PET		FAM		NED		VIC		PET		FAM
Putative Zygote	209.83	211.85	218.54	231.75	180.23	X	149.24	150.36	96.45	96.45	92.55	92.55	225.06	227.08	224.27	224.27	277.84	289.52	344.54	344.54	246.66	246.66	272.68	272.68	99.73	99.73	132.59	136.91	107.65	107.65	86.69	86.69	184.01	197.26	182.94	197.48	232.29	232.29	251.16	285.59	250.54	250.54	486.59	489.5	504.22	512.76	368.94	378.13	128.88
Clone 1a	X	X	X	X	0	X	PS	X	0	X	NCNN	NCNN	0	X	X	X	X	X	X	X	X	X	X	X	X	X	0	0	X	0	X	X	X	X	X	X	X	X	X	X	X	0	PS	X	X	X	X	X	X
Clone 1b	X	X	X	X	X	X	X	X	X	X	NCNN	NCNN	X	X	X	X	X	X	X	X	0	X	X	X	X	X	X	X	X	0	X	0	X	X	X	X	X	X	X	X	X	X	X	X	X	X	X	X	X
Clone 1c	X	X	X	X	X	X	X	X	X	X	NCNN	NCNN	X	X	X	X	X	X	X	X	X	X	X	X	X	0	X	X	X	0	X	0	0	X	X	X	X	0	X	X	X	X	X	X	X	X	X	X	X
Clone 1d	X	X	0	0	0	X	X	X	0	X	NCNN	NCNN	0	0	X	X	-3	X	X	X	X	X	X	X	X	X	0	X	X	0	X	X	X	X	X	X	X	0	X	X	X	0	X	X	X	X	X	X	0
Clone 1e	X	X	X	0	0	X	X	X	0	X	NCNN	NCNN	X	X	X	X	X	X	X	X	X	X	X	0	X	0	0	X	X	X	X	0	X	X	X	X	X	0	X	X	X	0	PS	X	X	X	X	X	X
Clone 1f	X	X	X	X	0	X	X	X	X	X	NCNN	NCNN	0	X	X	X	X	X	X	X	0	X	X	X	X	X	X	0	PS	0	X	0	X	X	X	X	X	0	X	X	X	0	PS	X	X	X	X	X	0
Clone 1g	X	X	X	X	X	X	X	X	X	X	NCNN	NCNN	X	X	X	X	X	X	X	X	X	X	X	X	X	X	0	X	X	0	X	0	X	X	X	X	X	0	X	X	X	0	PS	X	X	X	X	X	0
Clone 1h	0	0	X	X	X	X	X	X	X	X	NCNN	NCNN	X	X	X	X	X	X	X	X	X	X	X	X	X	X	X	X	X	X	X	0	X	X	X	X	X	X	X	X	X	X	X	X	X	X	X	X	X
Clone 2a	0	0	X	0	0	X	PS	X	0	X	NCNN	NCNN	0	X	X	X	X	X	X	X	0	X	X	X	X	0	X	0	X	0	X	0	0	X	X	X	X	0	X	X	X	X	0	0	X	X	X	X	0
Clone 3a	0	0	X	X	0	X	X	X	0	X	NCNN	NCNN	X	X	X	X	X	X	X	X	0	X	X	0	X	0	X	0	X	X	X	0	X	X	X	X	X	0	X	X	X	X	0	X	X	X	X	X	X
LEGEND
Analyzed values:
-5
-4
-3
-2
-1
0
1
2
3
4
5
Non-analyzed values:
X = No signal
NSD = No sizing data
PS = Problematic signal
NAMP = Not amplified
NCNN = NC not negative
[truncated: 141 more columns]
